# Supplementary material for: Gene expression profiling reveals different pathways related to Abl and other genes that cooperate with c-Myc in a model of plasma cell neoplasia
Source: PubMed Central journal article supplement (PMC2040348; doi:10.1186/1471-2164-8-302), 2007-08-31
Supplement: 1471-2164-8-302-S3.pdf [file 1471-2164-8-302-S3.pdf]

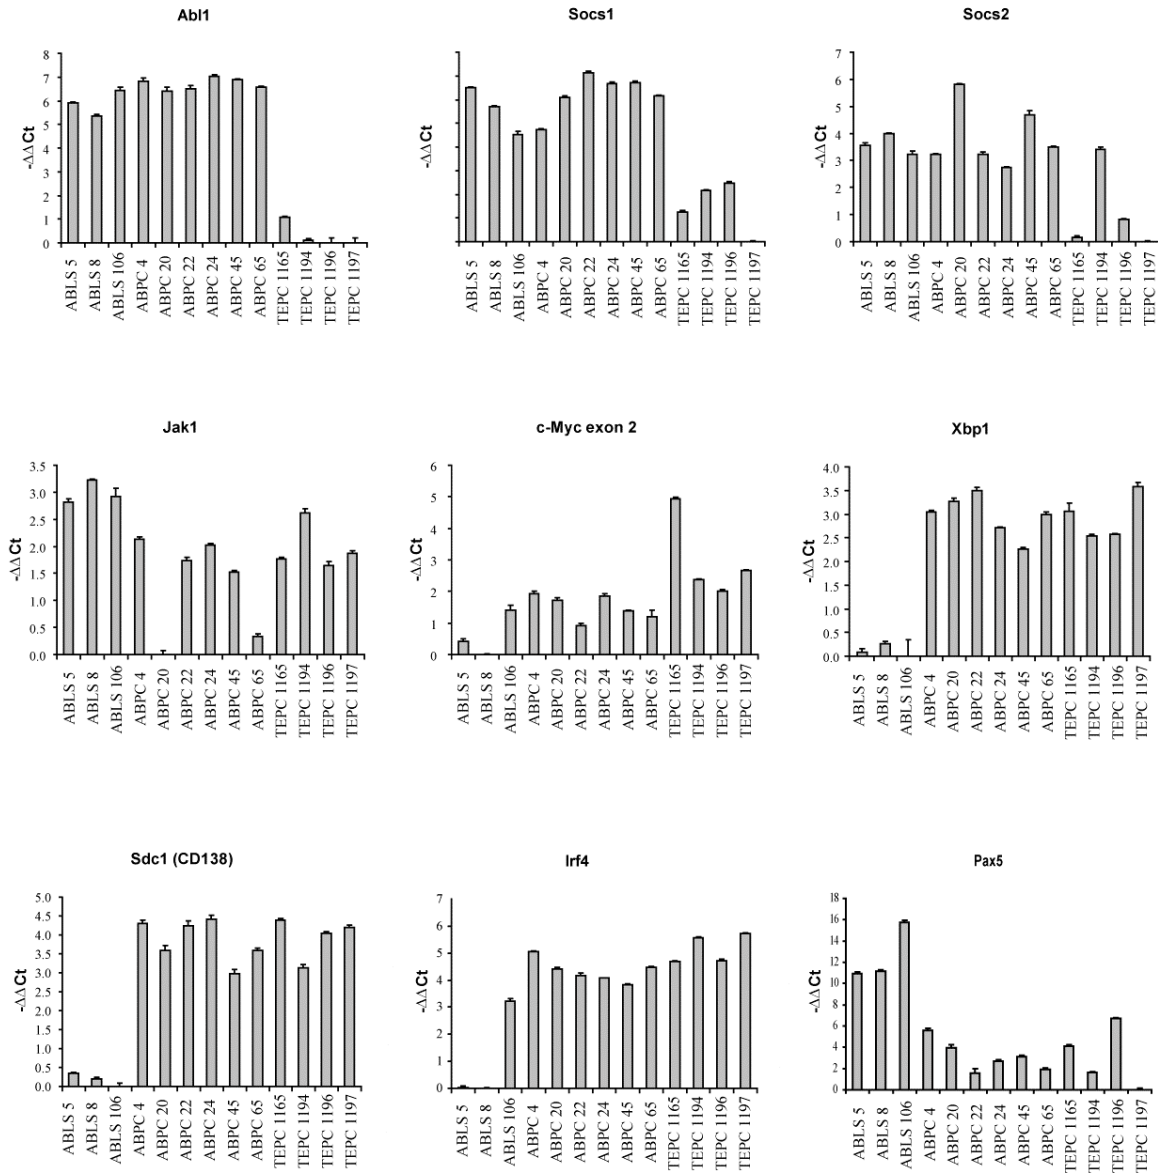

**Additional file 3, Supplementary Figure 1.** RNAs from the 13 indicated tumors were assayed for relative mRNA content for 9 key genes: *c-Myc*, *Socs1*, *Socs2*, *Abl1*, *Jak1*, *Xbp1*, *Sdc1*, *Irf4*, and *Pax5* (*BSAP*) as well as for the “housekeeping gene,” GAPDH, using primers designed in consultation with the manufacturer (Applied Biosystems, Foster City, CA). All data were normalized to GAPDH, and these values were then calibrated against the sample with the lowest expression and represented as  $-\Delta\Delta Ct$  values with standard errors.
