# Supplementary material for: Gene expression profiling reveals different pathways related to Abl and other genes that cooperate with c-Myc in a model of plasma cell neoplasia
Source: PubMed Central journal article supplement (PMC2040348; doi:10.1186/1471-2164-8-302), 2007-08-31
Supplement: 1471-2164-8-302-S5.pdf [file 1471-2164-8-302-S5.pdf]

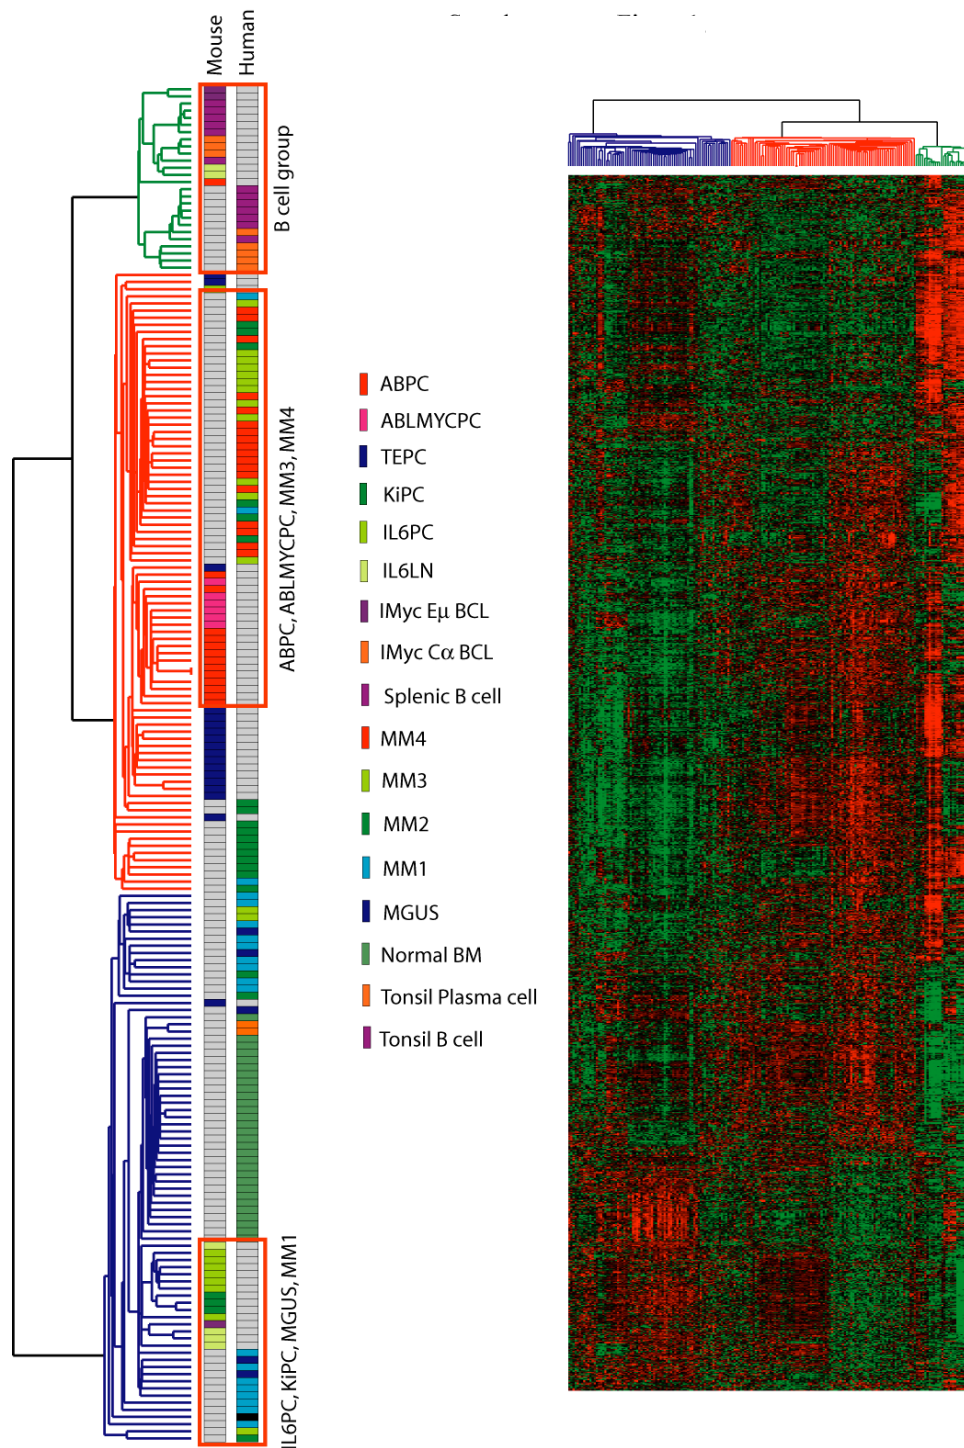

**Additional file 5, Supplementary Figure 2.** A total of 190 samples comprised of 123 human samples and 67 mouse samples were used for this meta-analysis. Human samples are composed of normal bone marrow samples, MGUS, 4 different stages of multiple myeloma (MM1, MM2, MM3 and MM4), tonsil plasma and tonsil B cells. Mouse samples are composed of 5 different plasmacytomas groups (ABPC, ABLMYC, TEPC, KiPC and IL6PC), 3 B cell lymphoma groups (BLL, BL and IL6 LN) and iMycE $\mu$  pre-malignant splenic B cells. The human and mouse data were normalized and standardized separately. The genes for cluster analysis were selected by one-way ANOVA analysis of combined orthologues, and 1488 genes that showed significant differences ( $p < 1 \times 10^{-7}$ ) were used for cluster analysis.
